# Supplementary material
Source: PubMed Central journal article supplement (PMC7340721)
Supplement: 12264_2020_502_MOESM1_ESM.pdf [file 12264_2020_502_MOESM1_ESM.pdf]

## Supplemental Figures

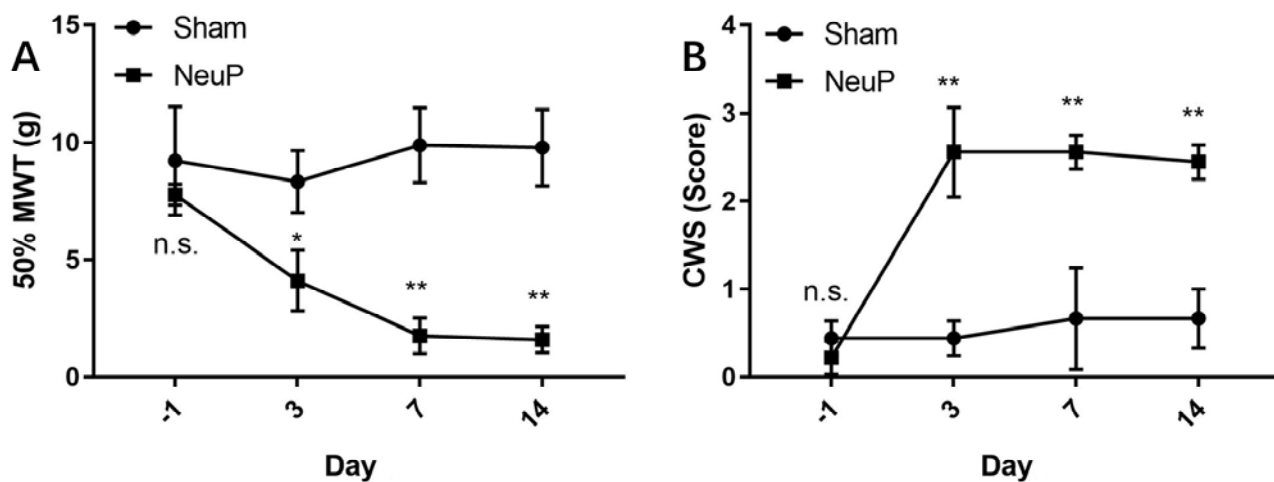

**Fig. S1** Mechanical and cold allodynia is induced in rats after BPA. Both 50%MWT (A) and CWS (B) were measured from day 1 before surgery (day -1) to day 14 post-surgery (mean  $\pm$  SD;  $n = 8$ ; n.s., no significant difference, \* $P < 0.05$ , \*\* $P < 0.01$  vs Sham group).

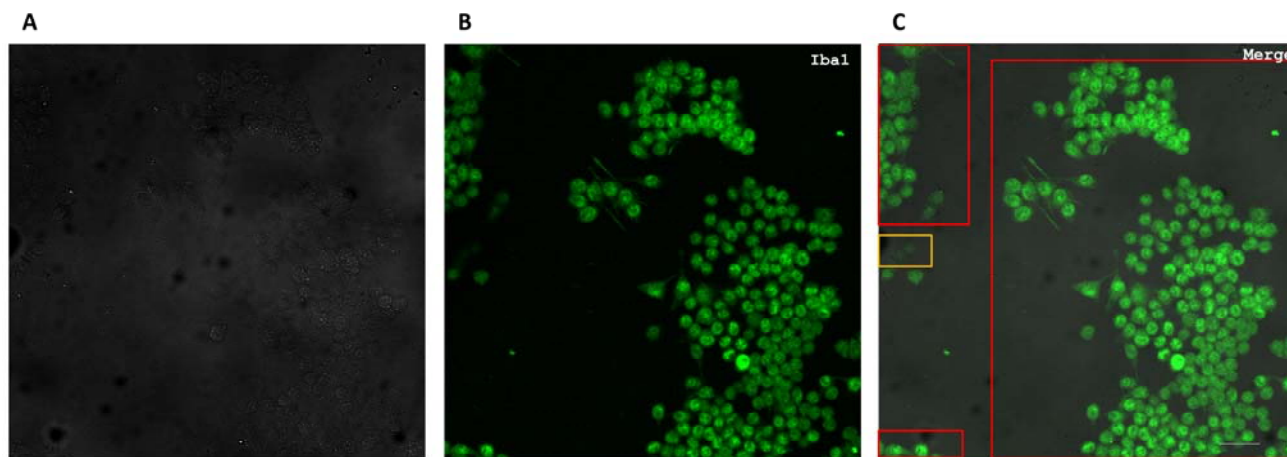

**Fig. S2** Representative images showing the high purity of primary microglia from the ACC of rats with BPA-induced neuropathic pain (scale bar, 20  $\mu$ m). (A) Bright-field image of one field. (B) All microglia stained with Iba-1 antibody in the same field. (C) Merged image; red boxes contain microglia except for two cells (yellow box).
